# Supplementary material
Source: PubMed Central journal article supplement (PMC8096663)

## Online-Only Supplement Tables and Figures:

### Supplement Table 1: CPT Procedure Codes Used to Identify Colonoscopy

| Code  | Definition                                                                                                                                              |
|-------|---------------------------------------------------------------------------------------------------------------------------------------------------------|
| 44388 | Colonoscopy through stoma; diagnostic, including collection of specimen(s) by brushing or washing, when performed (separate procedure)                  |
| 44389 | Colonoscopy through stoma; with biopsy, single or multiple                                                                                              |
| 44390 | Colonoscopy through stoma; with removal of foreign body                                                                                                 |
| 44391 | Colonoscopy through stoma; with control of bleeding (eg, injection, bipolar cautery, unipolar cautery, laser, heater probe, stapler, plasma coagulator) |
| 44392 | Colonoscopy through stoma; with removal of tumor(s), polyp(s), or other lesion(s) by hot biopsy forceps or bipolar cautery                              |
| 44393 | Colonoscopy through stoma; with ablation of tumor(s), polyp(s), or other lesion(s) not amenable to removal by forceps, cautery or snare                 |
| 44394 | Colonoscopy through stoma; with removal of tumor(s), polyp(s), or other lesion(s) by snare technique                                                    |
| 44397 | Colonoscopy through stoma; with transendoscopic stent placement (includes predilation)                                                                  |
| 44401 | Colonoscopy through stoma; with ablation of tumor(s), polyp(s), or other lesion(s) (includes pre- and post-dilation and guide wire passage)             |
| 44402 | Colonoscopy through stoma; with endoscopic stent placement (including pre- and post-dilation and guide wire passage, when performed)                    |
| 44403 | Colonoscopy through stoma; with endoscopic mucosal resection                                                                                            |
| 44404 | Colonoscopy through stoma; with directed submucosal injection(s), any substance                                                                         |
| 44405 | Colonoscopy through stoma; with transendoscopic balloon dilation                                                                                        |
| 44406 | Colonoscopy through stoma; with endoscopic ultrasound examination, limited to the sigmoid, descending, transverse, or ascending colon and cecum         |
| 44407 | Colonoscopy through stoma; with transendoscopic ultrasound guided intramural/transmural fine needle aspiration/biopsy(s)                                |
| 45355 | Colonoscopy, rigid or flexible, transabdominal via colotomy, single or multiple                                                                         |
| 45378 | Colonoscopy, flexible, proximal to splenic flexure; diagnostic, with or without collection of specimen(s) by brushing or washing                        |
| 45379 | Colonoscopy, flexible, proximal to splenic flexure; with removal of foreign body                                                                        |
| 45380 | Colonoscopy, flexible, proximal to splenic flexure; with biopsy, single or multiple                                                                     |
| 45381 | Colonoscopy, flexible; with directed submucosal injection(s), any substance submucosal injection(s), any substance                                      |
| 45382 | Colonoscopy, flexible; with control of bleeding, any method bleeding (eg, injection, cautery, laser, heater probe, stapler, plasma coagulator)          |
| 45383 | Colonoscopy, flexible, proximal to splenic flexure; with ablation of tumors, polyps, or other lesions not removable by forceps, cautery or snare        |
| 45384 | Colonoscopy, flexible; with removal of tumor(s), polyp(s), or other lesion(s) by hot biopsy forceps cautery                                             |
| 45385 | Colonoscopy, flexible; with removal of tumor(s), polyp(s), or other lesion(s) by snare technique                                                        |
| 45386 | Colonoscopy, flexible; with transendoscopic balloon dilation balloon, 1 or more strictures                                                              |
| 45387 | Colonoscopy, flexible, proximal to splenic flexure; with transendoscopic stent placement (includes predilation)                                         |
| 45388 | Colonoscopy, flexible; with ablation of tumor(s), polyp(s), or other lesion(s) (includes pre- and post-dilation and guide wire passage, when performed) |
| 45389 | Colonoscopy, flexible; with endoscopic stent placement (includes pre- and post-dilation and guide wire passage, when performed)                         |
| 45390 | Colonoscopy, flexible; with endoscopic mucosal resection                                                                                                |
| 45391 | Colonoscopy, flexible, proximal to splenic flexure; with endoscopic ultrasound examination                                                              |
| 45392 | Colonoscopy, flexible, proximal to splenic flexure; with transendoscopic ultrasound guided intramural or transmural fine needle aspiration/biopsy(s)    |
| 45393 | Colonoscopy, flexible; with decompression (for pathologic distention) (eg, volvulus, megacolon),                                                        |

---

|       |                                                                                                                                                  |
|-------|--------------------------------------------------------------------------------------------------------------------------------------------------|
|       | including placement of decompression tube                                                                                                        |
| 45398 | Colonoscopy, flexible; with band ligation(s) (eg, hemorrhoids)                                                                                   |
| G0105 | Colorectal cancer screening; colonoscopy on individual at high risk                                                                              |
| G0121 | Colorectal cancer screening; colonoscopy on individual not meeting criteria for high risk                                                        |
| G6019 | Colonoscopy through stoma; with ablation of tumor(s), polyp(s), or other lesion(s) not amenable to removal by forceps, cautery or snare          |
| G6020 | Colonoscopy through stoma; with transendoscopic stent placement (includes predilation)                                                           |
| G6024 | Colonoscopy, flexible; proximal to splenic flexure; with ablation of tumors, polyps, or other lesions not removable by forceps, cautery or snare |
| G6025 | Colonoscopy, flexible, proximal to splenic flexure; with transendoscopic stent placement (includes predilation)                                  |

---

**Supplement Figure 1:** Rates of incident CRC, late stage CRC, and fatal CRC stratified by time to colonoscopy after abnormal FIT/FOBT, 1999-2015

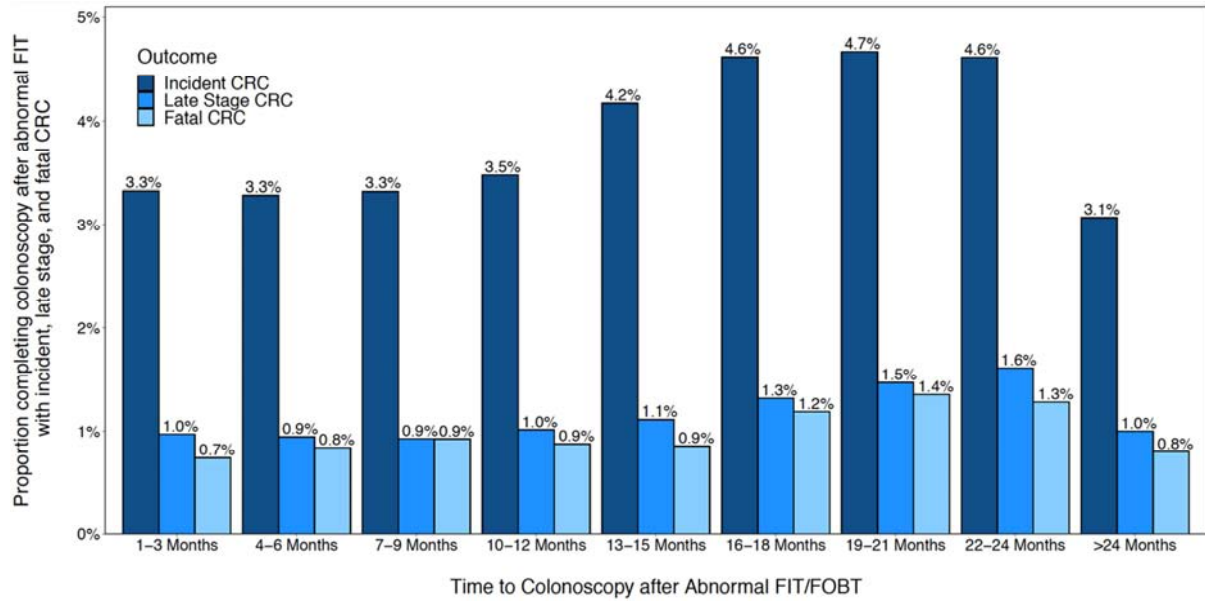

Supplement: NIHMS1668311-supplement-1.pdf [file NIHMS1668311-supplement-1.pdf]
